# Supplementary material
Source: publisher figshare collection journal article supplement (https://microbiology.figshare.com/ndownloader/files/20065583)
Supplement: Supplementary file 1 [file 20065583]

## Sheet: Table S4
Sample	Raw Megabases	% DENV DNA	CDS Assembly	Serotype	Genotype
SRR5821157	439.35	82.56	consensus	3	III
SRR5821158	77.34	85.19	consensus	3	III
SRR5821159	68.00	91.11	consensus	3	III
SRR5821160	119.54	97.77	consensus	3	III
SRR5821161	53.40	92.76	consensus	3	III
SRR5821162	49.59	99.39	consensus	3	III
SRR5821163	66.43	97.78	consensus	3	III
SRR5821164	69.96	99.18	consensus	3	III
SRR5821165	75.48	98.38	consensus	3	III
SRR5821166	38.99	62.03	de novo	3	III
SRR5821167	73.15	49.19	de novo	3	III
SRR5821168	49.59	99.63	consensus	3	III
SRR5821169	119.39	99.74	de novo	3	III
SRR5821170	61.45	99.09	consensus	3	III
SRR5821171	61.63	98.92	consensus	3	III
SRR5821172	69.86	98.96	de novo	3	III
SRR5821173	80.37	97.59	de novo	3	III
SRR5821174	37.58	76.69	de novo	3	III
SRR5821175	112.70	75.55	de novo	3	III
SRR5821176	139.34	99.03	de novo	3	III
SRR5821177	41.19	44.56	de novo	3	III
SRR5821178	59.03	81.06	de novo	3	III
SRR5821179	95.59	84.7	de novo	3	III
SRR5821180	48.75	98.15	consensus	3	III
SRR5821181	64.45	99.3	consensus	3	III
SRR5821182	64.40	98.88	consensus	3	III
SRR5821183	115.14	95.61	consensus	3	III
SRR5821184	170.72	94.11	de novo	3	III
SRR5821185	181.75	98.19	de novo	3	III
SRR5821186	246.98	96.4	de novo	3	III
SRR5821187	55.62	99.74	consensus	3	III
SRR5821188	70.95	99.39	consensus	3	III
SRR5821189	82.61	99.27	de novo	3	III
SRR5821190	138.58	98.81	consensus	3	III
SRR5821191	59.92	99.72	de novo	3	III
SRR5821192	40.53	36.88	consensus	3	III
SRR5821193	92.08	98.9	de novo	3	III
SRR5821194	58.69	98.53	consensus	3	III
SRR5821195	127.80	99.64	consensus	3	III
SRR5821196	59.30	86.62	de novo	3	III
SRR5821197	87.78	99.47	de novo	3	III
SRR5821198	185.55	99.72	de novo	3	III
SRR5821199	83.55	99.62	consensus	3	III
SRR5821200	85.52	99.5	consensus	3	III
SRR5821201	129.77	94.6	consensus	3	III
SRR5821202	56.60	99.81	consensus	3	III
SRR5821203	80.28	99.22	consensus	3	III
SRR5821204	68.46	95.52	de novo	3	III
SRR5821205	44.45	98.53	consensus	3	III
SRR5821206	43.67	97.88	consensus	3	III
SRR5821207	78.93	99.22	de novo	3	III
SRR5821208	87.45	97.72	consensus	3	III
SRR5821209	73.40	94.16	de novo	3	III
SRR5821210	55.86	91.35	de novo	3	III
SRR5821211	75.53	85.6	consensus	3	III
SRR5821212	98.89	99.09	de novo	3	III
SRR5821213	84.85	95.03	de novo	3	III
SRR5821214	15.33	96.28	de novo	3	III
SRR5821215	13.08	96.74	consensus	3	III
SRR5821216	45.07	98.85	de novo	3	III
SRR5821217	161.65	88.94	consensus	3	III
SRR5821218	51.09	95.29	consensus	3	III
SRR5821219	84.68	99.1	de novo	3	III
SRR5821220	88.26	82.64	de novo	3	III
SRR5821221	64.76	86.62	de novo	3	III
SRR5821222	93.47	97.48	consensus	3	III
SRR5821223	86.50	98.99	de novo	3	III
SRR5821224	73.31	26.43	consensus	3	III
SRR5821225	68.85	98.43	consensus	3	III
SRR5821226	67.75	96.67	consensus	3	III
SRR5821227	32.56	99.54	de novo	3	III
SRR5821228	38.73	86.68	consensus	3	III
SRR5821229	77.18	99.69	consensus	3	III
SRR5821230	175.73	99.58	de novo	3	III
SRR5821231	100.82	99.58	de novo	3	III
SRR5821232	86.89	99.47	consensus	3	III
SRR5821233	270.15	99.56	consensus	3	III
SRR5821234	76.07	99.75	consensus	3	III
SRR5821235	32.78	79.78	consensus	3	III
SRR5821236	80.19	24.72	de novo	3	III
SRR5821237	50.59	97.38	consensus	3	III
SRR5821238	63.56	97.63	de novo	3	III
SRR5821239	29.66	41.15	consensus	3	III
SRR5821240	62.61	94.64	de novo	3	III
SRR5821241	17.52	98.03	consensus	3	III
SRR5821242	58.86	99.25	consensus	3	III
SRR5821243	50.08	93.56	consensus	3	III
SRR5821244	32.67	99.09	consensus	3	III
SRR5821245	64.96	99.77	consensus	3	III
SRR5821246	104.11	90.14	consensus	3	III
SRR5821247	98.64	99.73	consensus	3	III
SRR5821248	129.28	90.73	consensus	3	III
SRR5821249	45.76	93.13	de novo	3	III
SRR5821250	72.54	98.88	de novo	3	III
SRR5821251	115.85	97.7	consensus	3	III
SRR5821252	60.76	94	consensus	3	III
SRR5821253	64.45	99.66	consensus	3	III
SRR5821254	0.27	98.12	consensus	3	III
SRR5821255	62.53	99.55	de novo	3	III
SRR5821256	54.57	99.58	consensus	3	III
SRR5821257	34.90	99.53	de novo	3	III
SRR5821258	68.64	99.6	consensus	3	III
SRR5821259	73.04	98.8	consensus	3	III
SRR5821260	54.60	99.14	consensus	3	III
SRR5821261	55.54	95.5	de novo	3	III
SRR5821262	106.05	91.78	consensus	3	III
